# Supplementary material for: Screening of reference genes for expression analysis in the study of soldier caste differentiation of Formosan subterranean termite Coptotermes formosanus Shiraki
Source: PeerJ. 2019 Nov 5;7:e7981. doi: 10.7717/peerj.7981 (PMC6839520; doi:10.7717/peerj.7981)
Supplement: Supplemental Information 2 — The first column is the name of the abdoman+thorax samples. The first row is the name of the 10 candidate reference genes. Each data point indicates the Ct value of a candidate reference gene from one sample. Four colonies were used. Each colony had two replicates. Each replicates had seven samples (referred to as 0D, 1D, 4D, 7D, 10D, 13D, and Pre). [file peerj-07-7981-s002.xlsx]

## Sheet: Sheet1
	RPL13a	NADH	β-actin	GAPDH	HSP70	RPL32	Ctyb	EF1-α	RPS18	18S
SYSU-A. Rep 1. Thorax+Abdoman. 0D	26.6	21.48	21.48	20.15	23.98	23.15	20.58	21.23	21.73	9.39
SYSU-A. Rep 1. Thorax+Abdoman. 1D	28.05	21.71	21.66	19.62	23.32	23.13	20.86	21.38	21.64	10.27
SYSU-A. Rep 1. Thorax+Abdoman. 4D	27.69	21.16	22.44	18.97	23.07	22.73	20.16	20.97	21.15	9.67
SYSU-A. Rep 1. Thorax+Abdoman. 7D	27.58	20.99	22.17	18.99	23.2	22.84	20.34	20.61	21.25	8.32
SYSU-A. Rep 1. Thorax+Abdoman. 10D	26.73	19.88	21.89	17.93	21.37	21.66	19	19.66	20.87	7.49
SYSU-A. Rep 1. Thorax+Abdoman. 13D	26.91	19.71	20.68	18.25	21.1	21.44	18.59	19.82	20.48	7.69
SYSU-A. Rep 1. Thorax+Abdoman. Pre	27.52	21.13	19.88	19.69	22.24	22.91	21.01	21.07	21.23	9.27
SYSU-A. Rep 2. Thorax+Abdoman. 0D	26.58	19.77	20.03	18.47	21.16	21.29	19.05	19.42	19.61	8.07
SYSU-A. Rep 2. Thorax+Abdoman. 1D	28.01	21.61	21.38	19.86	22.56	22.72	20.06	21.1	21.54	9.25
SYSU-A. Rep 2. Thorax+Abdoman. 4D	29.82	22.68	23.9	20.09	23.92	24.29	21.36	22.19	22.03	10.66
SYSU-A. Rep 2. Thorax+Abdoman. 7D	28.78	22.6	23.01	19.57	23.33	24.07	20.86	21.53	21.6	10.35
SYSU-A. Rep 2. Thorax+Abdoman. 10D	28.71	21.11	22.18	18.98	22.11	22.66	19.79	20.35	20.87	8.24
SYSU-A. Rep 2. Thorax+Abdoman. 13D	28.08	20.75	21.09	18.4	21.46	22.28	19.73	19.55	20.31	8.13
SYSU-A. Rep 2. Thorax+Abdoman. Pre	26.98	21.18	19.49	19.67	21.8	23.02	20.86	20.72	20.77	9.47
SCGS-D. Rep 1, Thorax+Abdoman. 0D	31.41	23.58	23.58	21.54	25.41	25.57	23.12	23.08	22.69	13.17
SCGS-D. Rep 1, Thorax+Abdoman. 1D	30.89	20.96	23.87	21.65	25.6	25.98	21.97	23.64	22.9	14.49
SCGS-D. Rep 1, Thorax+Abdoman. 4D	29.08	21.9	22.58	19.38	23.11	23.64	21.35	21.69	21.45	10.58
SCGS-D. Rep 1, Thorax+Abdoman. 7D	29.52	22.38	23.52	19.28	23.15	23.41	21.9	21.41	21.57	10.51
SCGS-D. Rep 1, Thorax+Abdoman. 10D	29.39	22.56	23.52	19.38	23.29	24.13	21.87	21.64	21.7	10.31
SCGS-D. Rep 1, Thorax+Abdoman. 13D	30.24	23.07	23.08	19.21	23.04	23.31	22.21	21.81	21.72	11.44
SCGS-D. Rep 1, Thorax+Abdoman. Pre	28.79	22.39	20.68	19.95	22.74	23.69	21.72	21.79	21.5	10.96
SCGS-D. Rep 2, Thorax+Abdoman. 0D	30.51	23.16	19.78	20.15	22.57	23.81	20.5	20.09	20.68	8.93
SCGS-D. Rep 2, Thorax+Abdoman. 1D	29.78	22.66	20.35	20.05	23.04	24.18	20.89	20.54	21.14	8.78
SCGS-D. Rep 2, Thorax+Abdoman. 4D	29.97	22.82	20.98	19.65	22.78	23.56	20.87	20.27	20.65	9.08
SCGS-D. Rep 2, Thorax+Abdoman. 7D	29.04	21.71	21.04	18.64	21.81	23.34	20.13	19.21	20.29	7.93
SCGS-D. Rep 2, Thorax+Abdoman. 10D	28.66	20.96	20.4	18.6	21.46	22.13	19.25	19.23	20.06	12.39
SCGS-D. Rep 2, Thorax+Abdoman. 13D	28.27	21.33	19.31	18	20.42	21.64	19.1	18.57	19.73	11.87
SCGS-D. Rep 2, Thorax+Abdoman. Pre	27.64	21.28	18.01	19.06	20.48	22.1	19.71	19.28	19.97	12.52
DFS-O. Rep 1. Thorax+Abdoman. 0D	28.15	21	20.82	19.53	22.88	22.88	20.8	20.68	21.01	8.9
DFS-O. Rep 1. Thorax+Abdoman. 1D	27.8	21.43	21.33	19.1	21.74	22.73	20.49	20.37	20.79	9.89
DFS-O. Rep 1. Thorax+Abdoman. 4D	28.58	21.92	22.93	19.55	23.81	23.91	21.37	21.49	21.27	10.47
DFS-O. Rep 1. Thorax+Abdoman. 7D	28.73	21.51	23.18	19.52	23.37	23.55	21.02	21.5	21.59	9.84
DFS-O. Rep 1. Thorax+Abdoman. 10D	28.08	21.34	22.31	18.47	22.08	22.91	20.31	20.8	20.78	9.77
DFS-O. Rep 1. Thorax+Abdoman. 13D	28.04	21.28	21.09	18.53	21.87	22.55	20.7	20.67	20.82	9.09
DFS-O. Rep 1. Thorax+Abdoman. Pre	27.77	20.75	19.44	19.41	22.39	23.05	20.49	21.64	21.23	8.8
DFS-O. Rep 2. Thorax+Abdoman. 0D	29.44	22.51	21.97	20.46	24.18	24	22.5	21.51	21.77	10.54
DFS-O. Rep 2. Thorax+Abdoman. 1D	29.9	22.8	22.66	20.83	24.68	25.13	22.68	22.63	22.26	11.14
DFS-O. Rep 2. Thorax+Abdoman. 4D	28.04	21.42	21.68	18.99	22.26	22.63	21.42	21.03	20.88	9.31
DFS-O. Rep 2. Thorax+Abdoman. 7D	28.48	22.08	23.35	19	22.58	23.07	21.68	21.6	21.59	9.38
DFS-O. Rep 2. Thorax+Abdoman. 10D	28.56	21.36	21.71	18.9	21.9	22.87	21.2	20.58	20.88	9.22
DFS-O. Rep 2. Thorax+Abdoman. 13D	28.34	21.24	21.67	18.86	21.67	22.34	20.2	20.56	20.79	9.37
DFS-O. Rep 2. Thorax+Abdoman. Pre	27.44	21.21	18.63	19.5	21.42	22.77	19.9	20.71	20.87	7.99
DFS-I. Rep 1. Thorax+Abdoman. 0D	28.28	21.16	20.65	19.46	22.01	22.46	20.01	20.6	21.01	9.5
DFS-I. Rep 1. Thorax+Abdoman. 1D	28.8	21.22	21.11	19.22	22.1	22.32	20.17	20.83	20.98	10.15
DFS-I. Rep 1. Thorax+Abdoman. 4D	27.69	20.57	22.07	18.51	21.52	22.16	19.59	21.24	20.56	9.78
DFS-I. Rep 1. Thorax+Abdoman. 7D	27.08	20.04	21.44	18.06	21.27	21.36	19.04	20.17	20.38	8.84
DFS-I. Rep 1. Thorax+Abdoman. 10D	26.81	19.55	19.89	17.82	20.54	21.09	18.28	19.38	19.89	9.24
DFS-I. Rep 1. Thorax+Abdoman. 13D	26.99	20.15	19.5	18.15	20.78	21.6	18.86	20.17	20.39	9.55
DFS-I. Rep 1. Thorax+Abdoman. Pre	27.33	20.32	19.13	19.23	21.08	21.54	19.77	21.19	20.96	9.96
DFS-I. Rep 2. Thorax+Abdoman. 0D	28.43	21.24	21.28	19.57	22.14	23.1	20.61	20.8	21.21	10.01
DFS-I. Rep 2. Thorax+Abdoman. 1D	28.46	21.28	21.35	19.41	22.25	22.65	20.47	20.82	21.28	10.1
DFS-I. Rep 2. Thorax+Abdoman. 4D	27.59	20.49	21.36	18.52	21.61	21.82	19.55	20.45	21.95	10.25
DFS-I. Rep 2. Thorax+Abdoman. 7D	27.37	20.06	21.25	17.99	20.81	21.4	18.83	19.67	20.41	9.17
DFS-I. Rep 2. Thorax+Abdoman.10D	27.42	20.27	20.85	18.33	21.37	21.81	19.19	20.2	20.57	10.11
DFS-I. Rep 2. Thorax+Abdoman.13D	27.46	20.18	19.28	18.61	21.01	21.68	19	20.31	20.63	9.36
DFS-I. Rep 2. Thorax+Abdoman. Pre	27.23	20.5	19.1	19.28	21.49	21.74	19.78	20.94	20.79	9.93
